# Supplementary material
Source: publisher figshare collection journal article supplement (https://sage.figshare.com/ndownloader/files/22294428)
Supplement: Supplementary file [file 22294428]

# Supplementary table

Mean SMQ and SSQ results over time (T1-T3) in children with Selective Mutism (SM) and the typically developing children (TDs)

|                      | SM (n=32)   |           | TDs (n=32)  |           |
|----------------------|-------------|-----------|-------------|-----------|
| <b>Parent rated</b>  | <b>Mean</b> | <b>sd</b> | <b>Mean</b> | <b>sd</b> |
| SMQ_school_T1        | 0.53        | 0.43      | 2.66        | 0.29      |
| SMQ_home_T1          | 1.73        | 0.66      | 2.86        | 0.21      |
| SMQ_public_T1        | 0.34        | 0.44      | 2.23        | 0.37      |
| SMQ_TOTAL_T1         | 0.87        | 0.36      | 2.58        | 0.23      |
| SMQ_school_T2        | 1.45        | 0.89      | 2.56        | 0.34      |
| SMQ_home_T2          | 2.25        | 0.56      | 2.84        | 0.24      |
| SMQ_public_T2        | 0.91        | 0.69      | 2.19        | 0.42      |
| SMQ_TOTAL_T2         | 1.58        | 0.61      | 2.55        | 0.26      |
| SMQ_school_T3        | 1.67        | 0.84      | 2.62        | 0.31      |
| SMQ_home_T3          | 2.45        | 0.46      | 2.80        | 0.26      |
| SMQ_public_T3        | 1.14        | 0.83      | 2.16        | 0.43      |
| SMQ_TOTAL_T3         | 1.79        | 0.62      | 2.55        | 0.27      |
| <b>Teacher rated</b> | <b>Mean</b> | <b>sd</b> | <b>Mean</b> | <b>sd</b> |
| SSQ_T1               | 0.54        | 0.44      | 2.67        | 0.35      |
| SSQ_T2               | 1.53        | 1.02      | 2.53        | 0.50      |
| SSQ_T3               | 1.54        | 0.90      | 2.51        | 0.55      |

SMQ Selective Mutism Questionnaire; SSQ School Speech Questionnaire;
